# Supplementary material for: Nuclear export of misfolded SOD1 mediated by a normally buried NES-like sequence reduces proteotoxicity in the nucleus
Source: eLife. 2017 May 2;6:e23759. doi: 10.7554/eLife.23759 (PMC5449186; doi:10.7554/eLife.23759)
Supplement: Figure 4—source data 1. — DOI: http://dx.doi.org/10.7554/eLife.23759.007 [file elife-23759-fig4-data1.xlsx]

## Sheet: Figure 4A
		WT	A4V	Q22L	L38R	H46R	H48R	C57R	P66A	H80R	D83G	G85R	D90A	G93A	G108V	H120L	L126S	L126Z	L144S
	Total transfected cells	392	395	340	431	389	411	423	376	393	402	450	435	408	495	355	367	462	410
	N<C cells	5	341	311	0	15	400	265	347	211	379	439	259	396	474	197	244	458	245
	α-NLP stained cells	7	384	326	431	377	405	411	361	374	398	450	421	408	495	321	296	462	317
	Percentage
		WT	A4V	Q22L	L38R	H46R	H48R	C57R	P66A	H80R	D83G	G85R	D90A	G93A	G108V	H120L	L126S	L126Z	L144S
	N<C%	1.27551	86.3291	91.4706	0	3.85604	97.3236	62.6478	92.2872	53.6896	94.2786	97.5556	59.5402	97.0588	95.7576	55.493	66.485	99.1342	59.7561
	α-NLP staining%	1.78571	97.2152	95.8824	100	96.9152	98.5401	97.1631	96.0106	95.1654	99.005	100	96.7816	100	100	90.4225	80.654	100	77.3171

## Sheet: Figure 4C
		Band density (WCL)	Band density (IP)	Ratio (IP/WCL)	Relative IP efficiency
	WT	81216.8	1021.48	0.0125773	1
	H46R	51974.6	14055.7	0.270435	21.5019
	D90A	55707.2	11030.7	0.198012	15.7436
	L126S	38647.4	27428.7	0.709716	56.4285
	L144S	62635.9	21829.3	0.348511	27.7096
	A4V	33617.1	53526.2	1.59223	126.596
	G85R	46802.9	64025.5	1.36798	108.766
	G93A	12966.2	32321.7	2.49277	198.196
	G108V	37204.6	53188.9	1.42963	113.668

## Sheet: Figure 4D
		TPEN 0h	2h	4h	6h
	Total transfected cellsr	392	404	527	505
	N<C cells	5	71	159	271
	α-NLP stained cells	7	80	192	293
	Percentage
		0h	2h	4h	6h
	N<C %	1.27551	17.5743	30.1708	53.6634
	α-NLP staining %	1.78571	19.802	36.4326	58.0198
