# Supplementary material for: Nuclear export of misfolded SOD1 mediated by a normally buried NES-like sequence reduces proteotoxicity in the nucleus
Source: eLife. 2017 May 2;6:e23759. doi: 10.7554/eLife.23759 (PMC5449186; doi:10.7554/eLife.23759)
Supplement: Figure 6—source data 1. — DOI: http://dx.doi.org/10.7554/eLife.23759.013 [file elife-23759-fig6-data1.xlsx]

## Sheet: Figure 6B
		Band density (WCL)	Band density (IP)	Ratio (IP/WCL)	Relative IP efficiency
	WT	11884	236	0.0198586	1
	L42Q	11892	479	0.0402792	2.0283
	G85R	9399	14296	1.52101	76.592
	G85R/L42Q	7579	13269	1.75076	88.1611

## Sheet: Figure 6C
	Absorbance (450 nm)
		Ctrl				MG132 5μM 24 h					blank
	Biological replicates	1	2	3	4	1	2	3	4		Replicates	Absorbance (450 nm)
	WT	1.9406	1.7902	1.8723	2.1615	1.5554	1.7284	1.801	1.5734		1	0.1689
	L42Q	2.2135	2.1786	2.3009	2.1515	1.7774	1.9252	1.9512	2.18		2	0.1792
	G85R	2.1137	2.091	2.1734	2.107	1.5386	1.3972	1.3362	1.3123		3	0.1724
	G85R/L42Q	1.8564	1.9393	1.8395	1.7856	1.0858	0.994	0.9385	0.9253		4	0.1545
											mean	0.16875
	Background subtracted
		Ctrl				MG132 5μM 24 h				Mean of Ctrl
	Biological replicates	1	2	3	4	1	2	3	4
	WT	1.7718	1.6214	1.7035	1.9927	1.3866	1.5596	1.6322	1.4046	1.77235
	L42Q	2.0447	2.0098	2.1321	1.9827	1.6086	1.7564	1.7824	2.0112	2.04232
	G85R	1.9449	1.9222	2.0046	1.9382	1.3698	1.2284	1.1674	1.1435	1.95248
	G85R/L42Q	1.6876	1.7705	1.6707	1.6168	0.917	0.8252	0.7697	0.7565	1.6864
	Viability (% to ctrl)
	Biological replicates	1	2	3	4
	WT	78.2506	88.0135	92.1106	79.2664
	L42Q	78.7757	86.0137	87.287	98.4917
	G85R	70.1742	62.9303	59.8053	58.5809
	G85R/L42Q	54.3891	48.9442	45.6524	44.8695
	Viability (% to ctrl)	Mean	SEM
	WT	84.4103	3.37491
	L42Q	87.642	4.07333
	G85R	62.8727	2.60037
	G85R/L42Q	48.4638	2.16338
		p value
	wt vs L42Q	0.563653
	G85R vs G85R/L42Q	0.00532313
