# Supplementary material for: Nuclear export of misfolded SOD1 mediated by a normally buried NES-like sequence reduces proteotoxicity in the nucleus
Source: eLife. 2017 May 2;6:e23759. doi: 10.7554/eLife.23759 (PMC5449186; doi:10.7554/eLife.23759)
Supplement: Figure 7—source data 1. — DOI: http://dx.doi.org/10.7554/eLife.23759.015 [file elife-23759-fig7-data1.xlsx]

## Sheet: Figure 7D
	Body bends in 1 min
	Worm #	WT	L42Q-1	L42Q-2	L42Q-3	G85R	G85R/L42Q-1	G85R/L42Q-2	G85R/L42Q-3
	1	75	91	90	114	24	1	3	4
	2	44	84	88	122	25	1	4	4
	3	93	81	112	58	18	2	4	2
	4	89	57	66	62	15	1	3	1
	5	106	74	106	29	13	1	2	3
	6	102	94	34	48	8	5	2	8
	7	64	67	81	87	8	1	1	8
	8	82	63	39	64	3	2	1	9
	9	66	92	85	59	14	2	4	2
	10	74	39	52	49	12	4	8	1
	11	36	89	78	53	11	6	8	3
	12	89	47	31	110	38	7	4	1
	13	53	85	46	61	25	2	2	1
	14	99	37	44	47	8	1	4	1
	15	77	75	32	81	12	3	2	4
	16	80	35	66	102	4	1	7	3
	17	43	58	61	36	3	2	2	1
	18	65	71	65	52	10	4	3	9
	19	49	56	78	86	5	3	3	2
	20	56	71	67	45	20	7	2	1
		WT	L42Q-1	L42Q-2	L42Q-3	G85R	G85R/L42Q-1	G85R/L42Q-2	G85R/L42Q-3
	Mean	72.1	68.3	66.05	68.25	13.8	2.8	3.45	3.4
	SEM	4.65149	4.21782	5.35354	6.0358	2.00998	0.456532	0.461548	0.634118
				p value
		WT vs G85R		6.02734e-14
		WT vs L42Q-1		0.548651
		WT vs L42Q-2		0.398965
		WT vs L42Q-3		0.61631
		G85R vs G85R/L42Q-1		4.6173e-06
		G85R vs G85R/L42Q-2		1.25229e-05
		G85R vs G85R/L42Q-3		1.62897e-05
