# Supplementary material for: Nuclear export of misfolded SOD1 mediated by a normally buried NES-like sequence reduces proteotoxicity in the nucleus
Source: eLife. 2017 May 2;6:e23759. doi: 10.7554/eLife.23759 (PMC5449186; doi:10.7554/eLife.23759)
Supplement: Figure 8—source data 1. — DOI: http://dx.doi.org/10.7554/eLife.23759.017 [file elife-23759-fig8-data1.xlsx]

## Sheet: Figure 8 A and B
	Worms survived
	Adult age (days)	WT	G85R	L42Q-1	L42Q-2	L42Q-3	G85R/L42Q-1	G85R/L42Q-2	G85R/L42Q-3
	L4	50	50	50	50	50	50	50	50
	1	50	50	50	50	50	50	50	49
	3	48	48	46	48	49	12	8	10
	5	47	42	45	47	46	8	6	8
	7	42	40	45	45	46	8	6	7
	9	42	38	44	43	46	7	6	7
	11	40	35	43	43	46	5	4	6
	13	38	30	41	41	44	4	4	5
	15	37	27	36	39	38	2	2	3
	17	36	25	35	33	32	2	1	3
	19	30	19	24	22	26	1	0	3
	21	20	12	14	9	16	0		1
	23	12	6	7	0	6			0
	25	3	2	2		1
	27	1	0	0		0
	29	0
Figure 8A	Survival %
	Adult age (days)	WT	G85	L42Q-1	L42Q-2	L42Q-3	G85R/L42Q-1	G85R/L42Q-2	G85R/L42Q-3
	L4	100	100	100	100	100	100	100	100
	1	100	100	100	100	100	100	100	98
	3	96	96	92	96	98	24	16	20
	5	94	84	90	94	92	16	12	16
	7	84	80	90	90	92	16	12	14
	9	84	76	88	86	92	14	12	14
	11	80	70	86	86	92	10	8	12
	13	76	60	82	82	88	8	8	10
	15	74	54	72	78	76	4	4	6
	17	72	50	70	66	64	4	2	6
	19	60	38	48	44	52	2	0	6
	21	40	24	28	18	32	0		2
	23	24	12	14	0	12			0
	25	6	4	4		2
	27	2	0	0		0
	29	0
Figure 8B
	Survived days
	worm#	WT	G85R	L42Q-1	L42Q-2	L42Q-3	G85R/L42Q-1	G85R/L42Q-2	G85R/L42Q-3
	1	3	3	3	3	3	3	3	1
	2	3	3	3	3	5	3	3	3
	3	5	5	3	5	5	3	3	3
	4	7	5	3	7	5	3	3	3
	5	7	5	5	7	13	3	3	3
	6	7	5	9	9	13	3	3	3
	7	7	5	11	9	15	3	3	3
	8	7	5	13	13	15	3	3	3
	9	11	7	13	13	15	3	3	3
	10	11	7	15	15	15	3	3	3
	11	13	9	15	15	15	3	3	3
	12	13	9	15	17	15	3	3	3
	13	15	11	15	17	17	3	3	3
	14	17	11	15	17	17	3	3	3
	15	19	11	17	17	17	3	3	3
	16	19	13	19	17	17	3	3	3
	17	19	13	19	17	17	3	3	3
	18	19	13	19	19	17	3	3	3
	19	19	13	19	19	19	3	3	3
	20	19	13	19	19	19	3	3	3
	21	21	15	19	19	19	3	3	3
	22	21	15	19	19	19	3	3	3
	23	21	15	19	19	19	3	3	3
	24	21	17	19	19	19	3	3	3
	25	21	17	19	19	21	3	3	3
	26	21	19	19	19	21	3	3	3
	27	21	19	21	19	21	3	3	3
	28	21	19	21	19	21	3	3	3
	29	21	19	21	21	21	3	3	3
	30	21	19	21	21	21	3	3	3
	31	23	19	21	21	21	3	3	3
	32	23	21	21	21	21	3	3	3
	33	23	21	21	21	21	3	3	3
	34	23	21	21	21	21	3	3	3
	35	23	21	21	21	23	3	3	3
	36	23	21	21	21	23	3	3	3
	37	23	21	23	21	23	3	3	3
	38	23	21	23	21	23	3	3	3
	39	25	23	23	21	23	5	3	3
	40	25	23	23	21	23	5	3	3
	41	25	23	23	21	23	5	3	5
	42	25	23	23	23	23	5	3	5
	43	25	23	23	23	23	9	5	7
	44	25	23	25	23	23	11	5	11
	45	25	25	25	23	25	11	11	13
	46	25	25	25	23	25	13	11	15
	47	25	25	25	23	25	15	15	15
	48	27	25	25	23	25	15	15	21
	49	27	27	27	23	25	19	17	21
	50	29	27	27	23	27	21	19	23
		WT	G85R	L42Q-1	L42Q-2	L42Q-3	G85R/L42Q-1	G85R/L42Q-2	G85R/L42Q-3
	Average Survival (days)	18.84	15.96	18.28	17.8	18.84	4.96	4.48	5.08
	SEM	0.928197	0.982832	0.84175	0.706985	0.70647	0.623355	0.558513	0.726945
		p value
	WT vs G85R	0.0444996
	WT vs L42Q-1	0.674886
	WT vs L42Q-2	0.406612
	WT vs L42Q-3	1
	G85R vs G85R/L42Q-1	6.23106e-15
	G85R vs G85R/L42Q-2	2.14977e-16
	G85R vs G85R/L42Q-3	8.81225e-14
