# Supplementary material for: Nuclear export of misfolded SOD1 mediated by a normally buried NES-like sequence reduces proteotoxicity in the nucleus
Source: eLife. 2017 May 2;6:e23759. doi: 10.7554/eLife.23759 (PMC5449186; doi:10.7554/eLife.23759)
Supplement: Figure 9—source data 1. — DOI: http://dx.doi.org/10.7554/eLife.23759.019 [file elife-23759-fig9-data1.xlsx]

## Sheet: Figure 9C
	Bagged worms
		WT	L42Q	G85R	G85R/L42Q
	Bagged worms	0	0	7	33
	Total	46	45	41	47
		WT	L42Q	G85R	G85R/L42Q
	Bagged worms (%)	0	0	17.0732	70.2128

## Sheet: Figure 9D
	Hatched eggs in bagged worms from Figure 9C
	Worm #	WT	L42Q	G85R	G85R/L42Q
	1			2	1
	2			3	5
	3			3	7
	4			1	7
	5			2	5
	6			3	2
	7			3	2
	8				5
	9				2
	10				9
	11				5
	12				2
	13				3
	14				3
	15				5
	16				8
	17				3
	18				2
	19				2
	20				6
	21				5
	22				5
	23				2
	24				9
	25				1
	26				6
	27				3
	28				2
	29				3
	30				7
	31				5
	32				3
	33				4
		WT	L42Q	G85R	G85R/L42Q
	mean	0	0	2.42857	4.21212
	SEM			0.297381	0.393502
		p value
	G85R vs G85R/L42Q	0.0480192

## Sheet: Figure 9E
	Eggs laid in 48 h
	Worm #	WT	L42Q	G85R	G85R/L42Q
	1	94	49	46	9
	2	42	66	99	7
	3	74	97	104	28
	4	112	133	48	6
	5	126	83	105	16
	6	96	87	66	68
	7	91	103	88	82
	8	93	122	82	10
	9	84	96	85	21
	10	85	75	67	4
	11	69	91	51	8
	12	37	76	41	2
		WT	L42Q	G85R	G85R/L42Q
	mean	83.5833	89.8333	73.5	21.75
	SEM	7.39519	6.66496	6.77283	7.53891
			p value
	WT vs L42Q		0.536599
	WT vs G85R		0.325578
	G85R vs G85R/L42Q		4.0737e-05
